# Supplementary material for: Secreting Germ Cell Tumors of the Central Nervous System: A Long-Term Follow-up Experience
Source: PubMed Central journal article supplement (PMC7565315; doi:10.3390/cancers12092688), 2020-09-21
Supplement: cancers-12-02688-s001.pdf [file cancers-12-02688-s001.pdf]

**Table S1.** Details of chemotherapy and radiotherapy.

| <i>Patient</i> | <i>PEB cycles</i> | <i>Deviations from the 6 scheduled PEB cycles and/or from RT schedule</i>                                                                                                                                            |
|----------------|-------------------|----------------------------------------------------------------------------------------------------------------------------------------------------------------------------------------------------------------------|
| 1              | 5                 | Complete surgery for PD after 4 PEB cycles, 1 PEB post-surgery, RT, PD at the 6th cycle --> intensification (Carboplatinum/Etoposide-Ifosfamide/Vincristine/HD-Cyclo, PBSC harvest, HD-VP16) -> further PD and death |
| 2              | 2                 | PD after 2 PEB cycles and exitus                                                                                                                                                                                     |
| 3              | 5                 | 1 PEB--> markers progression--> intrathecal CT and RT --> PEB x 4                                                                                                                                                    |
| 4              | 4                 | exitus for P. Carinii pneumonia after 4 PEB cycles in CR at autopsy                                                                                                                                                  |
| 5              | 6                 | 6th PEB cycle delivered at 75% of the dose for previous hematological toxicity                                                                                                                                       |
| 6              | 6                 | no deviations: 4 PEB--> RT --> 2 PEB                                                                                                                                                                                 |
| 7              | 4                 | no PEB post-RT because of the pre-radiant PEB-related toxicity                                                                                                                                                       |
| 8              | 6                 | no ventricular boost for stereotactic radiosurgery at diagnosis at another institution                                                                                                                               |
| 9              | 5                 | no 2nd PEB post RT for previous toxicity                                                                                                                                                                             |
| 10             | 5                 | no 2nd PEB post RT for previous toxicity                                                                                                                                                                             |
| 11             | 6                 | no deviations: 4 PEB--> RT --> 2 PEB                                                                                                                                                                                 |
| 12             | 2                 | 2 PEB cycles --> HD-etoposide-->HD-cyclo --> RT--> HD-TT x 2                                                                                                                                                         |
| 13             | 6                 | no deviations: 4 PEB--> RT --> 2 PEB                                                                                                                                                                                 |
| 14             | 6                 | no deviations: 4 PEB--> RT --> 2 PEB                                                                                                                                                                                 |
| 15             | 6                 | no deviations: 4 PEB--> RT --> 2 PEB                                                                                                                                                                                 |
| 16             | 6                 | 2 PEB cycles --> RT --> 4 PEB cycles                                                                                                                                                                                 |
| 17             | 6                 | no deviations: 4 PEB--> RT --> 2 PEB                                                                                                                                                                                 |
| 18             | 6                 | no deviations: 4 PEB--> RT --> 2 PEB                                                                                                                                                                                 |
| 19             | 6                 | no deviations: 4 PEB--> RT --> 2 PEB                                                                                                                                                                                 |
| 20             | 6                 | no deviations: 4 PEB--> RT --> 2 PEB                                                                                                                                                                                 |
| 21             | 6                 | no deviations: 4 PEB--> RT --> 2 PEB                                                                                                                                                                                 |
| 22             | 6                 | 5th PEB cycle delivered at 75% for previous hematological toxicity, 6th cycle at full dose                                                                                                                           |
| 23             | 6                 | no deviations: 4 PEB--> RT --> 2 PEB                                                                                                                                                                                 |
| 24             | 6                 | 6th PEB delivered at 75% for previous hematological toxicity                                                                                                                                                         |
| 25             | 6                 | no deviations: 4 PEB--> RT --> 2 PEB                                                                                                                                                                                 |
| 26             | 2                 | 2 PEB cycles --> HD-cyclo --> HD-TT x 1 due to poor PBSC rescue --> RT                                                                                                                                               |
| 27             | 2                 | 2 PEB cycles --> HD-cyclo --> HD-TT x 2 --> RT                                                                                                                                                                       |
| 28             | 4                 | 4 PEB cycle (pre-RT only)                                                                                                                                                                                            |

**LEGENDA:** PEB= cisplatin/etoposide/bleomycin; RT= radiotherapy; PD= progression disease; HD= high dose ; PBSC= peripheral blood stem cell ; VP16= etoposide ; CT= chemotherapy;TT= thiotepa ; cyclo= cyclophosphamide

**Table S2.** Radiotherapy details.

| <i>Patient</i> | <i>RT fields</i>                      | <i>Total dose CSI/boosted site</i>         |
|----------------|---------------------------------------|--------------------------------------------|
| 1              | CSI + WVI                             | CSI 25.5 Gy/WVI 45 Gy                      |
| 2              | -                                     | -                                          |
| 3              | CSI+ T (pineal gland)                 | CSI 30 Gy/T 45 Gy                          |
| 4              | -                                     | -                                          |
| 5              | CSI + WVI                             | CSI 25.5 Gy/WVI 45 Gy (Boost 21.6)         |
| 6              | CSI + WVI                             | CSI 25.5 Gy /WVI 45 Gy                     |
| 7              | CSI+WVI+TB (pineal gland)             | CSI 25.5 Gy/WVI 45 Gy/Pineal gland 19.8 Gy |
| 8              | CSI                                   | CSI 24 Gy                                  |
| 9              | CSI + WVI                             | CSI 25.5 Gy/WVI 45                         |
| 10             | CSI + WVI                             | CSI 25.5 Gy/WVI 45 Gy                      |
| 11             | CSI + WVI                             | CSI 25.5 Gy/WVI 45.6 Gy                    |
| 12             | CSI + WVI                             | CSI 30 Gy/WVI 45 Gy                        |
| 13             | CSI + TB (lumbar lesion)              | CSI 30 Gy/Lumbar lesion 39 Gy              |
| 14             | CSI + WVI                             | CSI 25.5 Gy/ WVI 45 Gy                     |
| 15             | CSI + WVI + TB (hypophyseal peduncle) | CSI 25.5 Gy/ WVI+T 45 Gy                   |

|    |                                            |                        |
|----|--------------------------------------------|------------------------|
| 16 | TB                                         | 54 Gy                  |
| 17 | CSI + WVI                                  | CSI 25.5 Gy/ WVI 45 Gy |
| 18 | CSI + WVI                                  | CSI 30 Gy /WVI 54 Gy   |
| 19 | CSI + WVI                                  | CSI 30 Gy/ WVI 54 Gy   |
| 20 | CSI + WVI                                  | CSI 30 Gy/WVI 54 Gy    |
| 21 | CSI + TB (hypothalamic-hypophyseal region) | CSI 30 Gy/T 54 Gy      |
| 22 | CSI + TB (hypophyseal peduncle)            | CSI 30 Gy/T 45 Gy      |
| 23 | CSI + WVI                                  | CSI 25.5 Gy/WVI 45 Gy  |
| 24 | CSI + WVI                                  | CSI 30 Gy/WVI 45 Gy    |
| 25 | CSI + WVI                                  | CSI 25.5/WVI 45 Gy     |
| 26 | CSI + TB (sellar region)                   | CSI 25.5 Gy/T 45 Gy    |
| 27 | CSI+ TB (pineal gland)                     | CSI 25.5 Gy /T 45 Gy   |
| 28 | CSI+ TB (pineal gland)                     | CSI 25.5 Gy /T 45 Gy   |

RT= radiotherapy; T= tumor site

CSI= craniospinal irradiation; TB= tumour bed

WVI= whole ventricular irradiation; Gy= Gray

Table S3. High-risk patients.

| Patient | Age at diagnosis (years) | Serum AFP ng/mL | CSF AFP ng/mL | Serum $\beta$ hcg IU/L | CSF $\beta$ hcg IU/L | RT fields | Total dose (Gy) | PEB cycles | Treatment schedule                                              |
|---------|--------------------------|-----------------|---------------|------------------------|----------------------|-----------|-----------------|------------|-----------------------------------------------------------------|
| 12      | 23.67                    | 11069           | 5862          | 54                     | 165                  | CSI + WVI | 30/45           | 2          | 2 PEB , HD-VP16, APHERESIS, HD-CYCLO--> RT--> HD-TT x 2         |
| 26      | 20.67                    | 1155            | 67,21         | 7.1                    | 8.1                  | CSI + TB  | 25.5/45         | 2          | 2 PEB , HD-CYCLO, APHERESIS, HD-TT x 1(poor PBSC harvest)--> RT |
| 27      | 15.75                    | 2614            | 1996          | 0,1                    | 1.3                  | CSI + TB  | 25.5/45         | 2          | 2 PEB , HD-CYCLO, APHERESIS, HD-TT x 2-->RT                     |

AFP= alpha-fetoprotein; HD= high dose; CSF= cerebrospinal fluid; VP16= etoposide; Gy= Gray ; CYCLO= cyclophosphamide; RT= radiotherapy; TT= thiotepa; PEB=cisplatin/etoposide/bleomycin; TB= tumour bed ; CSI= craniospinal irradiation; PBSC= peripheral blood stem cell; WVI= whole ventricular irradiation

Table S4. Neurocognitive evaluations: demographical characteristics of the sample.

| Demographical characteristics |  | n (%)      | Mean (SD)      |
|-------------------------------|--|------------|----------------|
| Gender (male)                 |  | 4 (66.70%) |                |
| Age at diagnosis [months]     |  |            | 132.33 (42.87) |
| Time since diagnosis [months] |  |            | 60.17 (57.39)  |
| Age at evaluation [months]    |  |            | 192.50 (48.58) |

Table S5. Neurocognitive evaluations: mean scores of neurocognitive abilities of patients and normative means

| Neurocognitive domain         | Whole sample |         | Normative means |         |
|-------------------------------|--------------|---------|-----------------|---------|
|                               | Mean         | (SD)    | Mean            | (SD)    |
| <i>Intellectual abilities</i> |              |         |                 |         |
| FSIQ                          | 83.00        | (15.44) | 100.00          | (15.00) |
| PIQ                           | 76.50        | (15.80) | 100.00          | (15.00) |
| VIQ                           | 92.33        | (19.42) | 100.00          | (15.00) |
| <i>Attention</i>              |              |         |                 |         |
| CPT Overall Index             |              |         | < 8             |         |
| <i>Executive Functioning</i>  |              |         |                 |         |
| WCST Errors                   | 89.83        | (17.21) | 100.00          | (15.00) |
| WCST Perseverations           | 91.50        | (15.99) | 100.00          | (15.00) |

---

|                                 |       |        |      |        |
|---------------------------------|-------|--------|------|--------|
| <i>Memory</i>                   |       |        |      |        |
| Rey Memory                      | -3.03 | (0.76) | 0.00 | (1.00) |
| <i>Visual-motor integration</i> |       |        |      |        |
| Rey Copy                        | -4.46 | (3.94) | 0.00 | (1.00) |

---
